# Supplementary material for: Phytochemical Profiling in Conjunction with In Vitro and In Silico Studies to Identify Human α-Amylase Inhibitors in Leucaena leucocephala (Lam.) De Wit for the Treatment of Diabetes Mellitus
Source: PubMed Central journal article supplement — ACS Omega. 2021 Jul 15;6(29):19045–57. doi: 10.1021/acsomega.1c02350 (PMC8320072; doi:10.1021/acsomega.1c02350), 2021-07-15
Supplement: ao1c02350_si_001.pdf [file ao1c02350_si_001.pdf]

**Phytochemical profiling in conjunction with *in vitro* and *in silico* studies identify human alpha-amylase inhibitors in *Leucaena leucocephala* (Lam.) De Wit for the treatment of diabetes mellitus**

Senthil Renganathan,<sup>1</sup> Sakthivel Manokaran,<sup>2</sup> Preethi Vasanthakumar,<sup>3</sup> Usha Singaravelu,<sup>2</sup> Pok-Son Kim,<sup>4</sup> Arne Kutzner,<sup>5</sup> Klaus Heese<sup>6,\*</sup>

<sup>1</sup> Department of Bioinformatics, Marudupandiyar College, Thanjavur, Tamil Nadu 613-403, India

<sup>2</sup> Department of Bioinformatics, Bharathiar University, Coimbatore, Tamil Nadu 641-046, India

<sup>3</sup> Department of Biotechnology, Bharath College of Science and Management, Thanjavur, Tamil Nadu 613-005, India

<sup>4</sup> Department of Mathematics, Kookmin University, 77 Jeongneung-ro, Seongbuk-gu, Seoul 136-702, Republic of Korea

<sup>5</sup> Department of Information Systems, College of Computer Science, Hanyang University, 222 Wangsimni-ro, Seongdong-gu, Seoul 133-791, Republic of Korea

<sup>6</sup> Graduate School of Biomedical Science and Engineering, Hanyang University, 222 Wangsimni-ro, Seongdong-gu, Seoul 133-791, Republic of Korea

**\* Correspondence**

Klaus Heese, Graduate School of Biomedical Science and Engineering, Hanyang University, 222 Wangsimni-ro, Seongdong-gu, Seoul 133-791, Republic of Korea.

E-mail: [klaus@hanyang.ac.kr](mailto:klaus@hanyang.ac.kr)

## Supporting Information

### Supplementary Tables

**Table S1** Qualitative histochemical analysis of *L. leucocephala* leaf powder

| <b>Phytochemicals</b> | <b>Color observation</b> | <b>Result</b> |
|-----------------------|--------------------------|---------------|
| Flavonoids            | Yellow                   | ++            |
| Polyphenol            | Green                    | ++            |
| Saponin               | Yellow                   | +             |
| Tannin                | Black                    | ++            |
| Terpenoids            | Orange                   | ++            |

+ present

++ abundantly present

**Table S2** Qualitative phytochemical analysis of *L. leucocephala* leaf extracts

| <b>Serial No</b> | <b>Phytochemicals</b> | <b>Alcohol extract</b> | <b>Aqueous extract</b> |
|------------------|-----------------------|------------------------|------------------------|
| 1                | Alkaloids             | -                      | -                      |
| 2                | Antroquinone          | +                      | ++                     |
| 3                | Coumarins             | +                      | ++                     |
| 4                | Flavonoids            | ++                     | ++                     |
| 5                | Glycosides            | +                      | +                      |
| 6                | Polyphenol            | +                      | ++                     |
| 7                | Saponin               | +                      | ++                     |
| 8                | Steroids              | +                      | +                      |
| 9                | Tannin                | +                      | +                      |
| 10               | Terpenoids            | +                      | +                      |
| 11               | Triterpenoids         | +                      | +                      |

**Table S3** Quantitative analysis of phytochemicals in *L. leucocephala* leaf extracts (70% ethanol)

| Phytochemicals | Quantity (mg/g) |
|----------------|-----------------|
| Flavonoids     | 50.76 ± 3.55    |
| Phenol         | 204.85 ± 14.33  |
| Saponin        | 30.09 ± 2.10    |
| Terpenoid      | 10.74 ± 0.75    |

Values (mg phytochemicals per gram leaf powder) are expressed as mean ± SD for experiments performed in triplicates. Leaf powder was quantitatively analyzed by standard procedures described previously [52-56, 58-61].

**Table S4** *In vitro* anti  $\alpha$ -amylase enzyme activity efficacy of *L. leucocephala* leaf extract (70% ethanol) compared with acarbose

| Concentration ( $\mu\text{g/mL}$ )          | % of inhibitions       |                     |
|---------------------------------------------|------------------------|---------------------|
|                                             | <i>L. leucocephala</i> | Acarbose (standard) |
| 100                                         | 16.19 ± 1.40           | 22.54 ± 1.57        |
| 200                                         | 26.99 ± 3.87           | 31.72 ± 2.22        |
| 300                                         | 53.52 ± 4.39           | 65.43 ± 4.58        |
| 400                                         | 74.63 ± 4.58           | 79.55 ± 5.56        |
| 500                                         | 90.42 ± 5.86           | 97.78 ± 6.84        |
| IC <sub>50</sub> value ( $\mu\text{g/mL}$ ) | 288.01                 | 252.59              |

Values are expressed as mean values from three independent experiments performed in triplicates (maximum mean deviation ± 5%). The IC<sub>50</sub> is a measure of the potency of the applied compounds in inhibiting  $\alpha$ -amylase enzyme activity.

**Table S5** ADMET properties of phytochemicals identified by GC-MS from ethanolic (70%) leaf extracts of *L. leucocephala*.

| Serial No | Compound IUPAC Name                                                           | CID    | MW (kDa) | SASA    | QP log Po/w (-2.0 to 6.5) | QP log Khsa (acceptable range: -1.5 to 1.5) | QP log HERG (acceptable range: above -5.0) | QPP log Caco Caco (nm/s) <25-poor >500-great | QP log BB (-3 to 1.2) | QPP MD CK (nm/s) <25-poor >500-great | Human oral absorption (<25% is poor and >80% is high) | Qualitative human oral absorption |
|-----------|-------------------------------------------------------------------------------|--------|----------|---------|---------------------------|---------------------------------------------|--------------------------------------------|----------------------------------------------|-----------------------|--------------------------------------|-------------------------------------------------------|-----------------------------------|
| 1         | 6-Methylheptan-1-ol, CAS number: 1653-40-3                                    | 15450  | 130.23   | 401.121 | 2.821                     | -0.256                                      | -3.334                                     | 3298.38                                      | -0.223                | 1797.09                              | 100                                                   | 3                                 |
| 2         | 3,7-Dimethylnonane, CAS number: 17302-32-8                                    | 28458  | 156.311  | 468.976 | 6.429                     | 0.603                                       | -3.679                                     | 9906.038                                     | 1.131                 | 5899                                 | 100                                                   | 1                                 |
| 3         | 3,7-Dimethyldecane, CAS number: 17312-54-8                                    | 28468  | 170.337  | 502.346 | 6.986                     | 0.736                                       | -3.932                                     | 9906.038                                     | 1.198                 | 5899                                 | 100                                                   | 1                                 |
| 4         | Cyclohexane-1,2,3,4,5,6-hexol, CAS number: 87-89-8                            | 892    | 180.151  | 347.714 | -2.4                      | -0.747                                      | -2.521                                     | 41.704                                       | -1.643                | 15.936                               | 28.935                                                | 2                                 |
| 5         | 4-bromo-2-[(2-phenylbenzotriazol-5-yl)iminomethyl]phenol, NIST Number: 223598 | 555309 | 393.242  | 644.776 | 4.756                     | 0.679                                       | -7.091                                     | 1347.316                                     | -0.452                | 1809.381                             | 100                                                   | 1                                 |
| 6         | Hexadecanoic acid, CAS number: 57-10-3                                        | 985    | 256.428  | 670.035 | 5.25                      | 0.532                                       | -3.289                                     | 239.307                                      | -1.46                 | 134.126                              | 87.303                                                | 3                                 |
| 7         | Tridecan-1-ol, CAS number: 112-70-9                                           | 8207   | 200.364  | 572.134 | 4.036                     | 0.326                                       | -4.59                                      | 2854.216                                     | -0.737                | 1537.0                               | 100                                                   | 3                                 |
| 8         | 2,3,6-Trimethyloctane, CAS number: 62016-33-5                                 | 112465 | 156.311  | 457.701 | 6.318                     | 0.61                                        | -3.484                                     | 9906.038                                     | 1.109                 | 5899                                 | 100                                                   | 1                                 |
| 9         | 2,6,10-Trimethylpenta                                                         | 19775  | 254.498  | 690.411 | 10.236                    | -1.554                                      | -5.008                                     | 9906.03                                      | 1.575                 | 5899                                 | 100                                                   | 1                                 |

|    |                                                                        |         |         |         |       |        |        |          |        |          |        |   |
|----|------------------------------------------------------------------------|---------|---------|---------|-------|--------|--------|----------|--------|----------|--------|---|
|    | decane, CAS number: 3892-00-0                                          |         |         |         |       |        |        |          |        |          |        |   |
| 10 | Tetradecanal, CAS number: 124-25-4                                     | 31291   | 212.375 | 601.808 | 4.268 | 0.457  | -4.768 | 1840.681 | -0.963 | 956.646  | 100    | 3 |
| 11 | 2-(diethylamino)-N-(2,6-dimethylphenyl)acetamide, CAS number: 137-58-6 | 3676    | 234.341 | 503.035 | 2.266 | -0.014 | -4.681 | 1321.919 | 0.418  | 7409     | 96.078 | 3 |
| 12 | N-trimethylsilylamine, CAS number: 3768-55-6                           | 77381   | 165.31  | 422.782 | 3.282 | 0.165  | -4.254 | 8460.865 | -4.254 | 4974     | 100    | 3 |
| 13 | (Z)-octadec-9-enoic acid, CAS number: 112-80-1                         | 445639  | 282.465 | 717.282 | 5.935 | 0.754  | -3.574 | 283.196  | -1.468 | 160.91   | 92.624 | 3 |
| 14 | Undecan-1-ol, CAS number: 112-42-5                                     | 8184    | 172.31  | 509.635 | 3.29  | 0.088  | -4.299 | 2854.193 | -0.584 | 1536.909 | 100    | 3 |
| 15 | (E)-3,7,11,15-Tetramethyl-2-hexadecen-1-ol, CAS number: 7541-49-3      | 5366244 | 296.535 | 737.582 | 6.314 | 1.232  | -5.172 | 2910.993 | -0.899 | 1570.086 | 100    | 1 |
| 16 | 2,6-Dimethylhepta-1,5-diene, CAS number: 6709-39-3                     | 81203   | 124.225 | 399.757 | 4.17  | 0.323  | -3.536 | 9906.038 | 0.897  | 5899.293 | 100    | 3 |
| 17 | Spiro[4.4]nona-3,8-diene, CAS number: 6569-94-4                        | 570703  | 120.194 | 339.494 | 3.229 | 0.156  | -3.324 | 9906.038 | 0.577  | 5899.293 | 100    | 3 |

**Note:** CID, compound ID; MW, molecular weight of the molecule; SASA, solvent accessible surface area; QP logS, predicted aqueous solubility; QP log K<sub>hsa</sub>, prediction of binding to human serum albumin; QP logHERG, predicted IC<sub>50</sub> value for the blockage of HERG K<sup>+</sup> channels; QPP caco, predicted apparent Caco-2 cell permeability in nm/sec; QP log BB, predicted brain/blood partition coefficient; QPP MDCK, predicted apparent MDCK cell permeability in nm/sec; human oral absorption, predicted qualitative human oral absorption.

**Table S6** Predicted docking score of  $\alpha$ -amylase with select phytochemicals identified by GC-MS from the ethanolic (70%) leaf extract of *L. leucocephala*.

| Serial No | Compound IUPAC Name | CID | Docking score (kcal/mol) | Glide score (kcal/mol) | Glide E <sub>vdw</sub> (kcal/mol) | Glide E <sub>coul</sub> (kcal/mol) | Glide energy (kcal/mol) | Glide einternal |
|-----------|---------------------|-----|--------------------------|------------------------|-----------------------------------|------------------------------------|-------------------------|-----------------|
|-----------|---------------------|-----|--------------------------|------------------------|-----------------------------------|------------------------------------|-------------------------|-----------------|

|    |                                                                                                 |             |        |        |         |         |         | (kcal/m<br>ol) |
|----|-------------------------------------------------------------------------------------------------|-------------|--------|--------|---------|---------|---------|----------------|
| 1  | 6-Methylheptan-1-ol,<br>CAS number: 1653-<br>40-3                                               | 15450       | -2.996 | -2.996 | -11.238 | -6.615  | -17.985 | 0.945          |
| 2  | 3,7-Dimethylnonane,<br>CAS number: 17302-<br>32-8                                               | 28458       | -2.054 | -2.054 | -15.405 | -0.048  | -15.453 | 3.285          |
| 3  | 3,7-Dimethyldecane,<br>CAS number: 17312-<br>54-8                                               | 28468       | -2.054 | -2.054 | -15.405 | -0.048  | -15.453 | 3.285          |
| 4  | Cyclohexane-<br>1,2,3,4,5,6-hexol,<br>CAS number: 87-89-8                                       | 892         | -6.136 | -6.136 | -15.33  | -14.933 | -30.263 | 2.086          |
| 5  | 4-bromo-2-[(2-<br>phenylbenzotriazol-5-<br>yl)iminomethyl]pheno<br>l,<br>NIST Number:<br>223598 | 55530<br>9  | -4.564 | -4.733 | -41.608 | -0.525  | -42.132 | 0.101          |
| 6  | Hexadecanoic acid,<br>CAS number: 57-10-3                                                       | 985         | -1.313 | -1.316 | -22.88  | -5.64   | -28.519 | 0.948          |
| 7  | Tridecan-1-ol,<br>CAS number: 112-70-<br>9                                                      | 8207        | -1.583 | -1.583 | -19.293 | -6.325  | -25.618 | 2.631          |
| 8  | 2,3,6-Trimethyloctane,<br>CAS number: 62016-<br>33-5                                            | 11246<br>5  | -2.591 | -2.591 | -18.83  | -0.165  | -18.996 | 1.119          |
| 9  | 2,6,10-<br>Trimethylpentadecane,<br>CAS number: 3892-<br>00-0                                   | 19775       | 0.001  | 0.001  | -25.254 | 0.131   | -25.122 | 2.525          |
| 10 | Tetradecanal, CAS<br>number: 124-25-4                                                           | 31291       | 2.747  | 2.747  | -24.238 | -4.036  | -28.274 | 2.408          |
| 11 | 2-(diethylamino)-N-<br>(2,6-<br>dimethylphenyl)aceta<br>mide, CAS number:<br>137-58-6           | 3676        | -5.766 | -5.766 | -28.305 | -8.531  | -36.836 | -6.694         |
| 12 | N-<br>trimethylsilylaniline,<br>CAS number: 3768-<br>55-6                                       | 77381       | -3.167 | -3.168 | -21.454 | 0.44    | -21.894 | 0.063          |
| 13 | (Z)-octadec-9-enoic<br>acid, CAS number:<br>112-80-1                                            | 44563<br>9  | -1.266 | -1.269 | -25.076 | -5.073  | -30.149 | 4.008          |
| 14 | Undecan-1-ol, CAS<br>number: 112-42-5                                                           | 8184        | -1.51  | -1.51  | -15.656 | -6.156  | 21.182  | 2.294          |
| 15 | (E)-3,7,11,15-<br>Tetramethyl-2-<br>hexadecen-1-ol, CAS<br>number: 7541-49-3                    | 53662<br>44 | -4.699 | -4.699 | -28.382 | -6.347  | -34.732 | 3.392          |
| 16 | 2,6-Dimethylhepta-<br>1,5-diene, CAS<br>number: 6709-39-3                                       | 81203       | -1.176 | -1.176 | -14.254 | -0.517  | -14.831 | 0.195          |
| 17 | Spiro[4.4]nona-3,8-<br>diene, CAS number:<br>6569-94-4                                          | 57070<br>3  | -2.825 | -2.825 | -13.348 | -0.204  | -13.553 | 0              |

**Note:** CID, compound ID; evdW, van der Waals energy; eCoul, Coulomb energy; energy ( $\Delta G$ ), binding energy; einternal, internal energy.

**Table S7** Homo - Lumo energy gap calculation of all the phytochemicals identified by GC-MS from the ethanolic (70%) leaf extracts of *L. leucocephala*.

| Serial No | Compound IUPAC Name                                                           | CID     | Solvation Energy $\Delta E$ (kJ/mol) | Homo value (eV) | Lumo value (eV) | Homo - Lumo Gap (eV) |
|-----------|-------------------------------------------------------------------------------|---------|--------------------------------------|-----------------|-----------------|----------------------|
| 1         | 6-Methylheptan-1-ol, CAS number: 1653-40-3                                    | 15450   | 4.092                                | 31.18           | 41.21           | -10.02               |
| 2         | 3,7-Dimethylnonane, CAS number: 17302-32-8                                    | 28458   | 6.904                                | 59.35           | 23.57           | 35.79                |
| 3         | 3,7-Dimethyldecane, CAS number: 17312-54-8                                    | 28468   | 7.44                                 | 60.6            | 22.91           | 37.68                |
| 4         | Cyclohexane-1,2,3,4,5,6-hexol, CAS number: 87-89-8                            | 892     | 15.88                                | 66.44           | 49.63           | 16.82                |
| 5         | 4-bromo-2-[(2-phenylbenzotriazol-5-yl)iminomethyl]phenol, NIST Number: 223598 | 555309  | 0                                    | 0               | 0               | 0                    |
| 6         | Hexadecanoic acid, CAS number: 57-10-3                                        | 985     | 9.373                                | 29.67           | 31.25           | -1.58                |
| 7         | Tridecan-1-ol, CAS number: 112-70-9                                           | 8207    | 6.75                                 | 31.22           | 42.36           | -11.14               |
| 8         | 2,3,6-Trimethyloctane, CAS number: 62016-33-5                                 | 112465  | 8.814                                | 57.52           | 23.39           | 34.14                |
| 9         | 2,6,10-Trimethylpentadecane, CAS number: 3892-00-0                            | 19775   | 10.913                               | 68.27           | 24.06           | 44.21                |
| 10        | Tetradecanal, CAS number: 124-25-4                                            | 31291   | 6.75                                 | 34.35           | 36.54           | -2.19                |
| 11        | 2-(diethylamino)-N-(2,6-dimethylphenyl)acetamide, CAS number: 137-58-6        | 3676    | 30.335                               | 52.53           | 48.24           | 4.29                 |
| 12        | N-trimethylsilylaniline, CAS number: 3768-55-6                                | 77381   | -2.96                                | 56.6            | 54.03           | 2.57                 |
| 13        | (Z)-octadec-9-enoic acid, CAS number: 112-80-1                                | 445639  | 2.677                                | 29.35           | 42.51           | -13.16               |
| 14        | Undecan-1-ol, CAS number: 112-42-5                                            | 8184    | 6.002                                | 31.22           | 42.38           | -11.17               |
| 15        | (E)-3,7,11,15-Tetramethyl-2-hexadecen-1-ol, CAS number: 7541-49-3             | 5366244 | 10.87                                | 46.67           | 44.17           | 2.5                  |
| 16        | 2,6-Dimethylhepta-1,5-diene, CAS number: 6709-39-3                            | 81203   | -5.7                                 | 52.63           | 53.22           | -0.59                |

|    |                                                    |        |      |       |      |       |
|----|----------------------------------------------------|--------|------|-------|------|-------|
| 17 | Spiro[4.4]nona-3,8-diene,<br>CAS number: 6569-94-4 | 570703 | 1.24 | 51.26 | 54.2 | -2.94 |
|----|----------------------------------------------------|--------|------|-------|------|-------|

**Note:** CID, compound ID; Homo, highest occupied molecular orbitals; Lumo, lowest unoccupied molecular orbitals.
